# Supplementary material for: Proteomic Analysis Identifies FNDC1, A1BG, and Antigen Processing Proteins Associated with Tumor Heterogeneity and Malignancy in a Canine Model of Breast Cancer
Source: MDPI journal article supplement (doi:10.3390/cancers13235901), 2021-11-24
Supplement: s1 [file s1]

Supplementary Table S1 - Patient Information

| Patient       | Age<br>(years) | Breed                 | Status                       | Sample | Tumor | Histopathological classification          |
|---------------|----------------|-----------------------|------------------------------|--------|-------|-------------------------------------------|
| PA1249        | 9              | Labrador<br>Retriever | Unknown<br>cause of<br>death | 58/17  | 1     | Anaplastic carcinoma                      |
|               |                |                       |                              |        | -     | Carcinoma e malignant<br>myoepithelioma** |
|               |                |                       |                              |        | -     | Anaplastic carcinoma**                    |
| 3255/<br>8448 | 12             | Daschund              | Death due<br>to tumor        | 61/17  | 2     | Complex carcinoma                         |
|               |                |                       |                              |        | 3     | Complex carcinoma                         |
|               |                |                       |                              |        | 4     | Mixed-type carcinoma                      |
|               |                |                       |                              |        | -     | Simple adenoma**                          |
|               |                |                       |                              |        | 5     | Complex carcinoma                         |
|               |                |                       |                              |        | 6     | Complex carcinoma                         |
|               |                |                       |                              |        | 7     | Mixed-type carcinoma                      |
|               |                |                       |                              |        | 8     | Mixed-type carcinoma                      |
|               |                |                       |                              |        | 9     | Complex carcinoma                         |
| 3528/<br>8432 | 12             | Poodle                | Alive*                       | 63/17  | 10    | Mixed-type carcinoma                      |
|               |                |                       |                              |        | 11    | Simple carcinoma                          |
|               |                |                       |                              |        | 12    | Mixed-type carcinoma                      |
|               |                |                       |                              |        | 13    | Simple carcinoma tubular type             |
|               |                |                       |                              |        | 14    | Benign mixed-type                         |
| 066/18        | 12             | Brazilian<br>Mastiff  | Death due<br>to tumor        | 66/18  | 15    | Invasive Micropapillar carcinoma          |
|               |                |                       |                              |        | 16    | Invasive Micropapillar carcinoma          |
| PA1796        | 13             | Mixed<br>Breed        | Death due<br>to tumor        | 71/18  | 17    | Simple carcinoma tubular type             |

\* Until last contact with the owner &gt; 400 days after surgery.

\*\* Tumor not included in the study due to tissue processing issues

Supplementary Table S2 - Discriminative analysis

| <i>m/z</i> | AUC  | FDR      | Fold Change  | log2 FC  |
|------------|------|----------|--------------|----------|
| 1863.858   | 0.76 | 4.31E-15 | -1.782408154 | -0.83383 |
| 2104.043   | 0.76 | 2.23E-12 | -1.752899149 | -0.80974 |
| 2216.036   | 0.76 | 5.14E-15 | -1.862037864 | -0.89688 |
| 1585.763   | 0.75 | 2.76E-14 | -2.037509717 | -1.02681 |
| 2056.961   | 0.75 | 1.19E-12 | -2.097088463 | -1.06839 |
| 2131.094   | 0.75 | 2.29E-13 | -1.908148197 | -0.93217 |
| 1095.561   | 0.74 | 1.29E-13 | -2.11731433  | -1.08224 |
| 1508.677   | 0.74 | 1.45E-15 | -1.797401081 | -0.84591 |
| 1576.799   | 0.74 | 2.13E-12 | -1.830989872 | -0.87262 |
| 1586.736   | 0.74 | 3.29E-11 | -2.329251963 | -1.21987 |
| 1607.744   | 0.74 | 1.30E-12 | -1.871561054 | -0.90424 |
| 1655.785   | 0.74 | 2.62E-12 | -1.894616544 | -0.92191 |
| 2120.034   | 0.74 | 1.61E-13 | -2.156605513 | -1.10876 |
| 2153.079   | 0.74 | 2.09E-13 | -2.160092346 | -1.11109 |
| 2853.371   | 0.74 | 4.31E-15 | -1.707898704 | -0.77222 |
| 2856.382   | 0.74 | 8.53E-15 | -2.037731265 | -1.02696 |
| 1096.565   | 0.73 | 2.00E-13 | -2.088640405 | -1.06256 |
| 1289.652   | 0.73 | 4.45E-11 | -1.631715792 | -0.70639 |
| 1332.649   | 0.73 | 1.73E-13 | -2.212737563 | -1.14583 |
| 1407.654   | 0.73 | 1.07E-13 | -1.775670132 | -0.82836 |
| 1453.736   | 0.73 | 1.36E-11 | -2.417976116 | -1.2738  |
| 1473.663   | 0.73 | 2.12E-12 | -1.79230365  | -0.84182 |
| 1560.805   | 0.73 | 2.42E-11 | -2.552094446 | -1.35168 |
| 1706.763   | 0.73 | 1.62E-11 | -2.021276191 | -1.01527 |
| 1735.826   | 0.73 | 1.04E-12 | -1.912496083 | -0.93546 |
| 1812.871   | 0.73 | 1.63E-12 | -1.881096413 | -0.91157 |
| 1818.891   | 0.73 | 2.27E-12 | -2.040937323 | -1.02923 |
| 1832.848   | 0.73 | 6.08E-12 | -2.143523185 | -1.09998 |
| 1834.889   | 0.73 | 3.56E-11 | -2.038655602 | -1.02762 |
| 1836.859   | 0.73 | 1.48E-11 | -2.338891145 | -1.22582 |
| 1839.872   | 0.73 | 2.10E-12 | -1.753104247 | -0.80991 |
| 1908.903   | 0.73 | 1.29E-13 | -1.975079385 | -0.98191 |
| 2252.1     | 0.73 | 4.31E-15 | -1.710749993 | -0.77463 |
| 2342.172   | 0.73 | 4.92E-13 | -1.791873818 | -0.84147 |
| 2343.165   | 0.73 | 1.74E-12 | -1.988564714 | -0.99173 |
| 2705.225   | 0.73 | 2.70E-13 | -1.540011171 | -0.62294 |
| 2706.231   | 0.73 | 9.04E-13 | -1.994603039 | -0.9961  |
| 3188.484   | 0.73 | 7.26E-14 | -2.2346746   | -1.16006 |
| 710.4064   | 0.72 | 1.86E-12 | -2.165326892 | -1.11458 |
| 710.7411   | 0.72 | 5.95E-13 | -2.19855789  | -1.13656 |
| 1054.499   | 0.72 | 5.73E-14 | -2.155516669 | -1.10803 |
| 1111.593   | 0.72 | 2.42E-12 | -1.872440246 | -0.90492 |
| 1115.541   | 0.72 | 4.19E-15 | -1.93199861  | -0.95009 |
| 1257.616   | 0.72 | 3.64E-13 | -1.89692901  | -0.92367 |
| 1267.67    | 0.72 | 3.73E-11 | -1.957436959 | -0.96897 |
| 1279.6     | 0.72 | 2.42E-12 | -1.831583888 | -0.87309 |
| 1428.711   | 0.72 | 4.68E-13 | -1.770337087 | -0.82402 |

|          |      |          |              |          |
|----------|------|----------|--------------|----------|
| 1465.684 | 0.72 | 5.26E-11 | -1.852156443 | -0.88921 |
| 1558.685 | 0.72 | 1.91E-10 | -1.695274127 | -0.76152 |
| 1566.741 | 0.72 | 6.21E-11 | -2.214216349 | -1.1468  |
| 1636.83  | 0.72 | 3.70E-15 | -1.777303256 | -0.82969 |
| 1653.833 | 0.72 | 3.27E-12 | -2.087167826 | -1.06155 |
| 1677.767 | 0.72 | 8.99E-12 | -2.127095802 | -1.08889 |
| 1727.767 | 0.72 | 2.08E-14 | -2.157350297 | -1.10926 |
| 1728.771 | 0.72 | 3.70E-15 | -1.796585963 | -0.84526 |
| 1758.725 | 0.72 | 5.06E-12 | -2.739438091 | -1.45388 |
| 1786.771 | 0.72 | 1.94E-13 | -2.10293502  | -1.0724  |
| 1798.805 | 0.72 | 2.00E-11 | -2.162163782 | -1.11248 |
| 1819.886 | 0.72 | 4.64E-13 | -2.375613544 | -1.2483  |
| 1885.84  | 0.72 | 1.94E-12 | -2.329867141 | -1.22025 |
| 1953.887 | 0.72 | 5.60E-15 | -1.77172587  | -0.82516 |
| 2019.96  | 0.72 | 4.01E-15 | -2.514971454 | -1.33054 |
| 2114.076 | 0.72 | 8.53E-12 | -2.436446528 | -1.28478 |
| 2423.143 | 0.72 | 8.58E-12 | -1.665609768 | -0.73605 |
| 2822.328 | 0.72 | 3.65E-12 | -2.016418859 | -1.0118  |
| 842.4093 | 0.71 | 1.34E-13 | -2.180662111 | -1.12477 |
| 868.4613 | 0.71 | 1.54E-11 | -2.034757308 | -1.02486 |
| 970.4753 | 0.71 | 1.24E-11 | -1.982509049 | -0.98733 |
| 1081.583 | 0.71 | 7.67E-13 | -1.718701856 | -0.78132 |
| 1132.482 | 0.71 | 1.88E-10 | -2.103564027 | -1.07284 |
| 1258.621 | 0.71 | 3.33E-12 | -1.731107256 | -0.7917  |
| 1264.535 | 0.71 | 7.22E-11 | -1.703586433 | -0.76858 |
| 1289.582 | 0.71 | 1.19E-12 | -1.835367143 | -0.87607 |
| 1401.639 | 0.71 | 3.13E-13 | -2.040098371 | -1.02864 |
| 1429.635 | 0.71 | 2.94E-12 | -2.132185941 | -1.09233 |
| 1475.716 | 0.71 | 1.44E-12 | -1.927863939 | -0.947   |
| 1530.659 | 0.71 | 1.86E-12 | -2.760398079 | -1.46488 |
| 1563.821 | 0.71 | 7.94E-12 | -2.311996741 | -1.20914 |
| 1588.725 | 0.71 | 1.17E-11 | -1.935277548 | -0.95254 |
| 1593.752 | 0.71 | 5.72E-11 | -2.02521381  | -1.01807 |
| 1598.782 | 0.71 | 1.50E-10 | -2.035992299 | -1.02573 |
| 1684.828 | 0.71 | 8.36E-16 | -1.904133039 | -0.92913 |
| 1694.86  | 0.71 | 1.29E-14 | -2.533910746 | -1.34137 |
| 1720.873 | 0.71 | 4.20E-11 | -1.957112765 | -0.96873 |
| 1827.893 | 0.71 | 1.07E-12 | -1.908857265 | -0.93271 |
| 1848.841 | 0.71 | 3.04E-10 | -2.410070181 | -1.26908 |
| 1992.92  | 0.71 | 6.61E-12 | -2.099158108 | -1.06981 |
| 2002.989 | 0.71 | 3.08E-11 | -1.75337283  | -0.81013 |
| 2078.946 | 0.71 | 1.07E-11 | -1.58967033  | -0.66873 |
| 2081.946 | 0.71 | 1.26E-12 | -2.185521303 | -1.12798 |
| 2089.017 | 0.71 | 6.03E-11 | -2.250529674 | -1.17026 |
| 2169.952 | 0.71 | 5.60E-15 | -2.163148589 | -1.11313 |
| 2195.977 | 0.71 | 8.73E-12 | -2.094415936 | -1.06655 |
| 2214.946 | 0.71 | 6.85E-10 | -1.876982895 | -0.90842 |
| 2219.961 | 0.71 | 3.21E-13 | -1.60199639  | -0.67987 |
| 2242.965 | 0.71 | 7.31E-15 | -1.474767921 | -0.56049 |
| 2316.029 | 0.71 | 4.74E-12 | -2.033432147 | -1.02392 |

|          |      |          |              |          |
|----------|------|----------|--------------|----------|
| 2719.21  | 0.71 | 8.73E-12 | -2.274932047 | -1.18582 |
| 679.5474 | 0.70 | 2.27E-11 | 1.794552452  | 0.843624 |
| 685.6922 | 0.70 | 2.58E-11 | -2.220920385 | -1.15116 |
| 686.0273 | 0.70 | 5.64E-12 | -2.146313873 | -1.10186 |
| 742.3051 | 0.70 | 1.31E-10 | 1.787413704  | 0.837874 |
| 758.3778 | 0.70 | 2.92E-12 | -1.772951415 | -0.82615 |
| 781.3937 | 0.70 | 1.49E-11 | -1.894860591 | -0.92209 |
| 785.3886 | 0.70 | 1.48E-11 | -1.979111834 | -0.98485 |
| 836.4349 | 0.70 | 4.60E-11 | -2.091066236 | -1.06424 |
| 840.4664 | 0.70 | 1.76E-10 | -1.667996007 | -0.73812 |
| 867.513  | 0.70 | 3.84E-11 | 1.695851605  | 0.76201  |
| 886.4352 | 0.70 | 9.47E-10 | -1.939518292 | -0.9557  |
| 898.5077 | 0.70 | 6.38E-10 | -1.825972946 | -0.86867 |
| 1041.613 | 0.70 | 1.63E-10 | 2.092501402  | 1.065229 |
| 1084.56  | 0.70 | 1.14E-11 | -2.058165556 | -1.04136 |
| 1088.534 | 0.70 | 1.33E-09 | -1.978800583 | -0.98463 |
| 1096.516 | 0.70 | 8.90E-11 | -1.986334319 | -0.99011 |
| 1117.543 | 0.70 | 8.35E-11 | -1.718707925 | -0.78132 |
| 1120.606 | 0.70 | 3.29E-11 | -1.712481694 | -0.77609 |
| 1128.557 | 0.70 | 2.26E-10 | -1.678128526 | -0.74685 |
| 1131.531 | 0.70 | 2.03E-11 | -1.633727273 | -0.70817 |
| 1142.589 | 0.70 | 1.32E-11 | -1.59694879  | -0.67532 |
| 1158.647 | 0.70 | 4.05E-11 | 2.427134903  | 1.279254 |
| 1165.555 | 0.70 | 1.29E-11 | -1.855902849 | -0.89212 |
| 1166.612 | 0.70 | 2.90E-12 | -1.926180295 | -0.94574 |
| 1177.564 | 0.70 | 1.21E-12 | -2.114972411 | -1.08064 |
| 1184.489 | 0.70 | 1.77E-10 | -1.886457679 | -0.91568 |
| 1201.58  | 0.70 | 1.96E-11 | -2.056285389 | -1.04004 |
| 1214.587 | 0.70 | 2.14E-12 | -1.796711563 | -0.84536 |
| 1226.643 | 0.70 | 2.69E-11 | -2.021024943 | -1.01509 |
| 1258.621 | 0.70 | 1.25E-10 | -2.28877864  | -1.19458 |
| 1262.627 | 0.70 | 2.47E-09 | -2.052750298 | -1.03756 |
| 1311.563 | 0.70 | 9.54E-12 | -2.428696776 | -1.28018 |
| 1337.674 | 0.70 | 2.42E-11 | -1.798589667 | -0.84687 |
| 1440.7   | 0.70 | 3.64E-16 | -2.089603072 | -1.06323 |
| 1487.664 | 0.70 | 1.87E-09 | -2.632601772 | -1.39649 |
| 1496.649 | 0.70 | 6.55E-11 | -2.171717938 | -1.11884 |
| 1538.711 | 0.70 | 1.36E-11 | -2.454496626 | -1.29543 |
| 1642.732 | 0.70 | 3.89E-12 | -1.881915779 | -0.9122  |
| 1649.773 | 0.70 | 3.58E-08 | -2.644381216 | -1.40293 |
| 1678.773 | 0.70 | 1.54E-11 | -2.238867161 | -1.16277 |
| 1700.737 | 0.70 | 7.05E-12 | -2.020732664 | -1.01488 |
| 1728.74  | 0.70 | 1.31E-08 | -2.548759245 | -1.3498  |
| 1744.759 | 0.70 | 2.01E-11 | -1.793015604 | -0.84239 |
| 1749.848 | 0.70 | 1.20E-10 | -1.849200089 | -0.8869  |
| 1750.852 | 0.70 | 2.07E-10 | -2.051696567 | -1.03682 |
| 1756.762 | 0.70 | 3.64E-10 | -2.452817062 | -1.29444 |
| 1757.804 | 0.70 | 8.09E-12 | -2.201993109 | -1.13881 |
| 1833.897 | 0.70 | 5.16E-11 | -2.027074326 | -1.0194  |
| 1856.845 | 0.70 | 4.55E-10 | -2.12656151  | -1.08852 |

|          |      |          |              |          |
|----------|------|----------|--------------|----------|
| 1888.903 | 0.70 | 3.65E-12 | -2.070260071 | -1.04981 |
| 2041.015 | 0.70 | 2.61E-09 | -1.83556151  | -0.87622 |
| 2063.928 | 0.70 | 2.28E-12 | -2.033521306 | -1.02398 |
| 2110.006 | 0.70 | 5.49E-09 | -2.345987049 | -1.2302  |
| 2198.948 | 0.70 | 8.73E-12 | -3.350626646 | -1.74443 |
| 2257.059 | 0.70 | 6.42E-12 | -1.729437342 | -0.7903  |
| 2268.091 | 0.70 | 3.56E-11 | -1.49965247  | -0.58463 |
| 2272.031 | 0.70 | 3.80E-11 | -1.602684931 | -0.68049 |
| 2274.077 | 0.70 | 2.13E-12 | -1.561091551 | -0.64256 |
| 2280.042 | 0.70 | 1.25E-10 | -1.99419825  | -0.99581 |
| 2290.07  | 0.70 | 1.22E-10 | -1.792715957 | -0.84215 |
| 2301.035 | 0.70 | 3.10E-09 | -1.981822325 | -0.98683 |
| 2344.15  | 0.70 | 1.55E-11 | -1.793312689 | -0.84263 |
| 2420.153 | 0.70 | 9.14E-11 | -1.677025554 | -0.7459  |
| 2435.176 | 0.70 | 1.42E-11 | -1.808032239 | -0.85442 |
| 2437.16  | 0.70 | 4.95E-09 | -2.280424736 | -1.1893  |
| 2549.193 | 0.70 | 2.98E-12 | -1.855817041 | -0.89205 |
| 2611.221 | 0.70 | 2.51E-09 | -2.220252084 | -1.15072 |
| 2703.216 | 0.70 | 6.50E-13 | -2.153325003 | -1.10657 |
| 2820.339 | 0.70 | 7.84E-11 | -2.157007346 | -1.10903 |
| 2876.364 | 0.70 | 1.34E-13 | 1.974112187  | 0.981204 |

Supplementary Table S3 - Identity assignment

| Mass matching - LC-MS (DE m/z) |                        |              | Protein                                                    | Symbol          |
|--------------------------------|------------------------|--------------|------------------------------------------------------------|-----------------|
| Observed m/z (MSI)             | Theoretical m/z (LCMS) | Error (ppm)  |                                                            |                 |
| 836.4349428                    | 836.43733              | 2.853980804  | Collagen alpha-1(I) chain                                  | COL1A1          |
| 840.4664466                    | 840.46863              | 2.597885254  | Collagen alpha-2(I) chain                                  | COL1A2          |
| 867.513017                     | 867.50468              | -9.61036458  | Fibronectin type III domain containing 1                   | FNDC1           |
| 868.4613165                    | 868.46354              | 2.560234594  | Collagen alpha-2(I) chain                                  | COL1A2          |
| 886.4351666                    | 886.43772              | 2.880472211  | Collagen alpha-1(I) chain                                  | COL1A1          |
| 1041.612806                    | 1041.60512             | -7.378986012 | <b>Keratin 19</b>                                          | <b>KRT19</b>    |
|                                |                        |              | <b>IF rod domain-containing protein</b>                    | <b>KRT18</b>    |
| 1084.559882                    | 1084.56734             | 6.876901254  | Protein disulfide-isomerase                                | PDIA3           |
| 1096.516204                    | 1096.50917             | -6.414695994 | Peptidylprolyl isomerase                                   | FKBP10          |
| 1111.592518                    | 1111.59937             | 6.164449562  | SERPINE1 mRNA binding protein 1                            | SERBP1          |
| 1120.606475                    | 1120.61093             | 3.97595533   | T-complex protein 1 subunit gamma                          | CCT3            |
| 1128.557115                    | 1128.56438             | 6.437154662  | Erythrocyte membrane protein band 4.1 like 2               | EPB41L2         |
| 1131.531114                    | 1131.52766             | -3.052711208 | Lamin A/C                                                  | LMNA            |
| 1165.555324                    | 1165.54839             | -5.949528676 | Stathmin                                                   | STMN1           |
| 1166.611827                    | 1166.6092              | -2.251610591 | Alpha-1-B glycoprotein                                     | A1BG            |
| 1177.563935                    | 1177.55242             | -9.779009966 | Versican                                                   | VCAN            |
| 1184.488719                    | 1184.49535             | 5.597887581  | Caldesmon 1                                                | CALD1           |
| 1201.579621                    | 1201.58815             | 7.098249529  | Insulin like growth factor binding protein 5               | IGFBP5          |
| 1214.586772                    | 1214.576               | -8.869017204 | LIM domain and actin binding 1                             | LIMA1           |
| 1226.643484                    | 1226.6528              | 7.594906684  | Filamin A                                                  | FLNA            |
| 1258.620978                    | 1258.62737             | 5.078729227  | Tankyrase 1 binding protein 1                              | TNKS1BP1        |
| 1279.599711                    | 1279.59132             | -6.557441379 | Transgelin                                                 | TAGLN2          |
| 1289.581578                    | 1289.5869              | 4.126590252  | DEAD-box helicase 3 X-linked                               | DDX3X           |
| 1311.563208                    | 1311.56992             | 5.117584025  | <b>HATPase_c domain-containing protein</b>                 | <b>HSP90AB1</b> |
|                                |                        |              | <b>Heat shock protein 90 alpha family class A member 1</b> | <b>HSP90AA1</b> |
| 1332.648959                    | 1332.639               | -7.473516054 | <b>Tropomyosin 1</b>                                       | <b>TPM1</b>     |
|                                |                        |              | <b>Tropomyosin 2</b>                                       | <b>TPM2</b>     |
| 1337.674103                    | 1337.67696             | 2.136004974  | Purine nucleoside phosphorylase                            | PNP             |
| 1401.639318                    | 1401.64923             | 7.07185018   | Elastin microfibril interfacer 2                           | EMILIN2         |
| 1428.710805                    | 1428.70775             | -2.138079695 | Calnexin                                                   | CANX            |
| 1430.638557                    | 1430.64341             | 3.392254692  | peptidyl-prolyl cis-trans isomerase NIMA-interacting 4     | PIN4            |
| 1473.663429                    | 1473.65644             | -4.742353625 | BCL2 associated athanogene 3                               | BAG3            |
| 1508.676561                    | 1508.68634             | 6.481823094  | A-kinase anchoring protein 12                              | AKAP12          |
| 1558.684573                    | 1558.69547             | 6.991339514  | Eukaryotic translation elongation factor 1 delta           | EEF1D           |
| 1560.804534                    | 1560.81288             | 5.347468615  | Collagen alpha-1(I) chain                                  | COL1A1          |
| 1585.762918                    | 1585.77174             | 5.563455753  | Beta-casein                                                | CSN2            |
| 1598.781714                    | 1598.79081             | 5.689435818  | Marginal zone B and B1 cell specific protein               | MZB1            |
| 1636.829666                    | 1636.83044             | 0.472705291  | <b>Tubulin beta chain</b>                                  | <b>TUBB4B</b>   |
|                                |                        |              | <b>Tubulin beta chain</b>                                  | <b>TUBB</b>     |
|                                |                        |              | <b>Tubulin beta chain</b>                                  | <b>TUBB2A</b>   |
|                                |                        |              | <b>Tubulin beta 1 class VI</b>                             | <b>TUBB1</b>    |
| 1653.833087                    | 1653.84424             | 6.743970629  | Collagen type XII alpha 1 chain                            | COL12A1         |
| 1812.871458                    | 1812.86101             | -5.763458468 | ADP ribosylation factor GTPase activating protein 3        | ARFGAP3         |
| 1818.891464                    | 1818.88281             | -4.758039953 | Catenin alpha 1                                            | CTNNA1          |
| 1833.897314                    | 1833.90897             | 6.355870521  | Heat shock protein family A (Hsp70) member 5               | HSPA5           |
| 1839.872016                    | 1839.88401             | 6.518749375  | Heterogeneous nuclear ribonucleoprotein M                  | HNRNPM          |
| 1888.903191                    | 1888.91094             | 4.102141475  | Jupiter microtubule associated homolog 2                   | JPT2            |
| 1908.902626                    | 1908.91584             | 6.922255907  | Uncharacterized protein                                    | NA              |
| 2002.988775                    | 2003.00533             | 8.26514225   | Collagen alpha-1(I) chain                                  | COL1A1          |
| 2056.961085                    | 2056.96443             | 1.626021729  | Collagen type XII alpha 1 chain                            | COL12A1         |
| 2063.928283                    | 2063.93049             | 1.069208615  | Transglutaminase 2                                         | TGM2            |
| 2089.016734                    | 2089.00927             | -3.573120401 | Collagen type VI alpha 3 chain                             | COL6A3          |
| 2104.043339                    | 2104.05569             | 5.86999721   | PDZ domain-containing protein                              | AHNAK2          |
| 2110.006386                    | 2110.00472             | -0.789684191 | Collagen type XII alpha 1 chain                            | COL12A1         |
| 2153.079398                    | 2153.0808              | 0.651090944  | Collagen type XII alpha 1 chain                            | COL12A1         |
| 2344.150356                    | 2344.14108             | -3.956972897 | Lipocln_cytosolic_FA-bd_dom domain-containing protein      | OBP2B           |
| 3188.483712                    | 3188.48256             | -0.361273044 | Caldesmon 1                                                | CALD1           |
